# Supplementary material
Source: PubMed Central journal article supplement (PMC4406769)

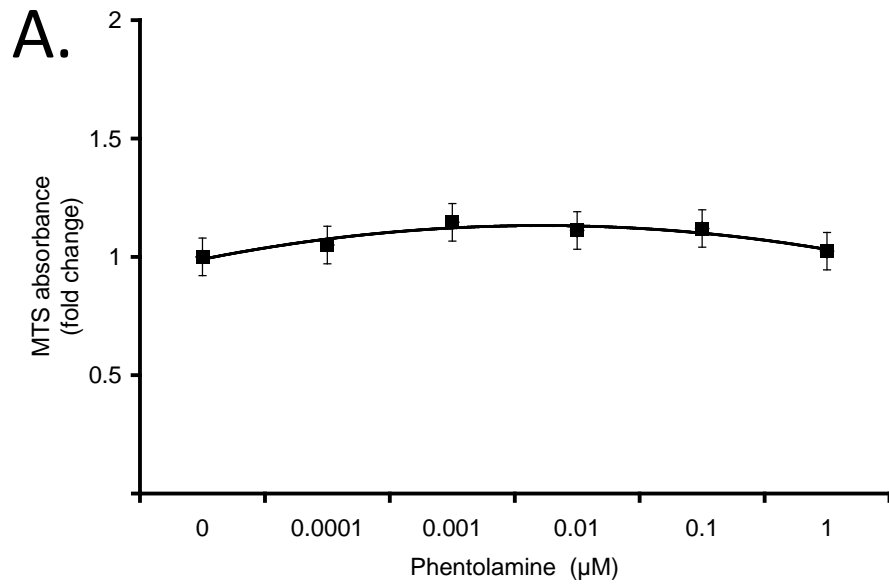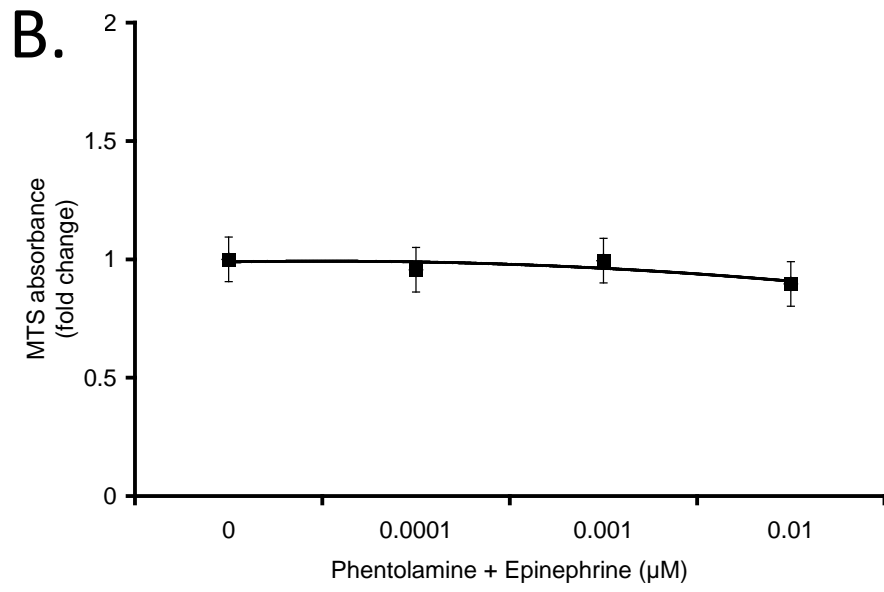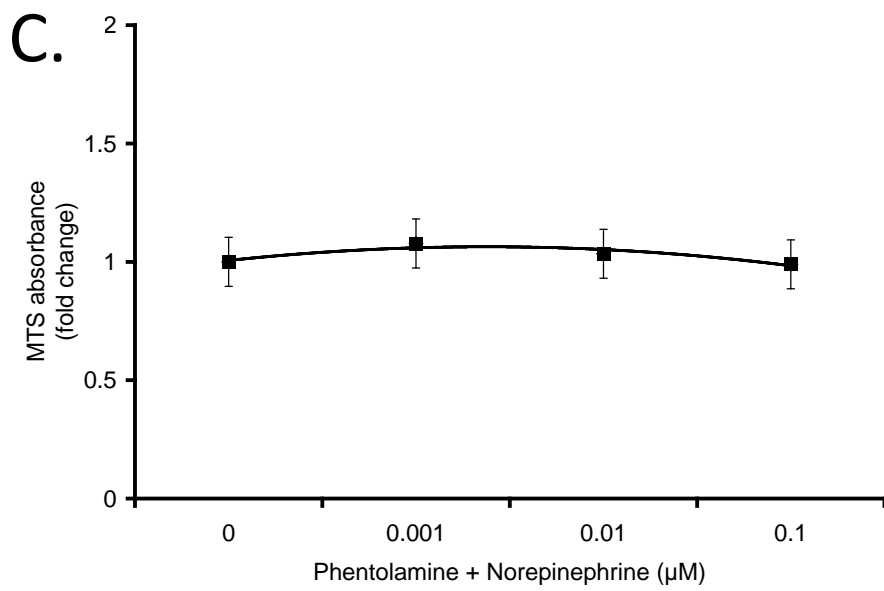

Supplement: NIHMS639769-supplement-1.pdf [file NIHMS639769-supplement-1.pdf]

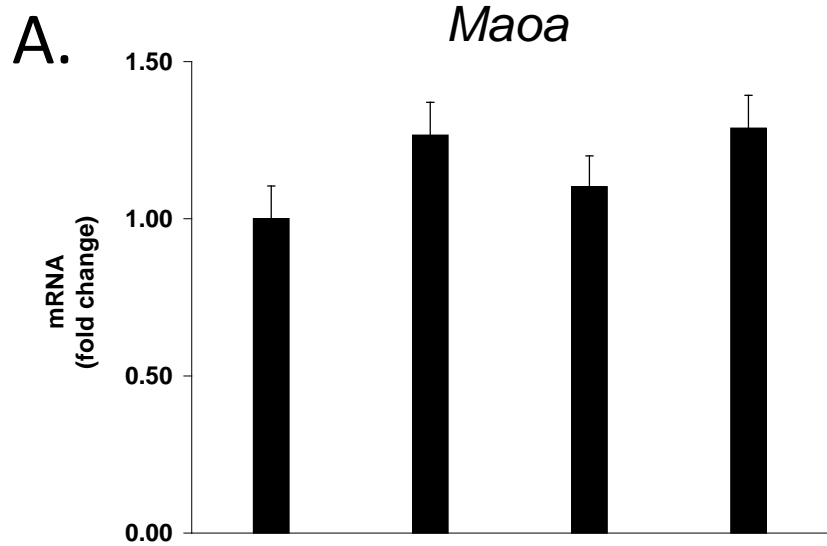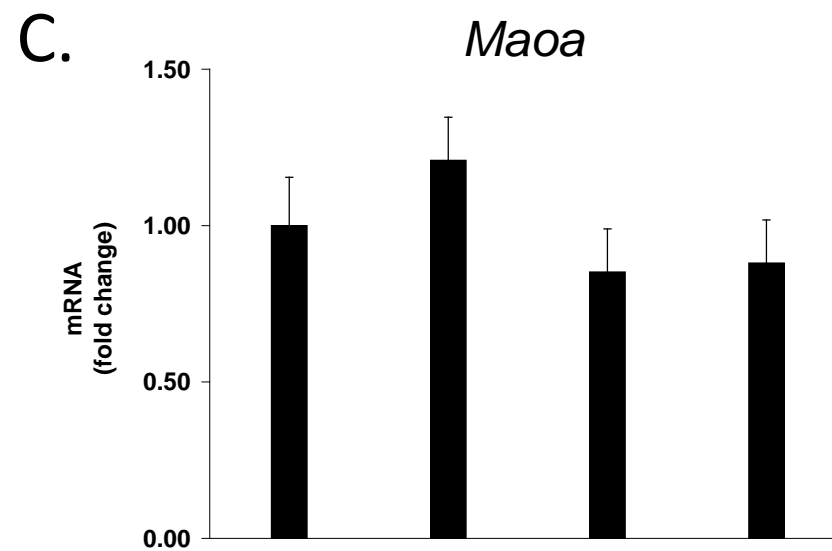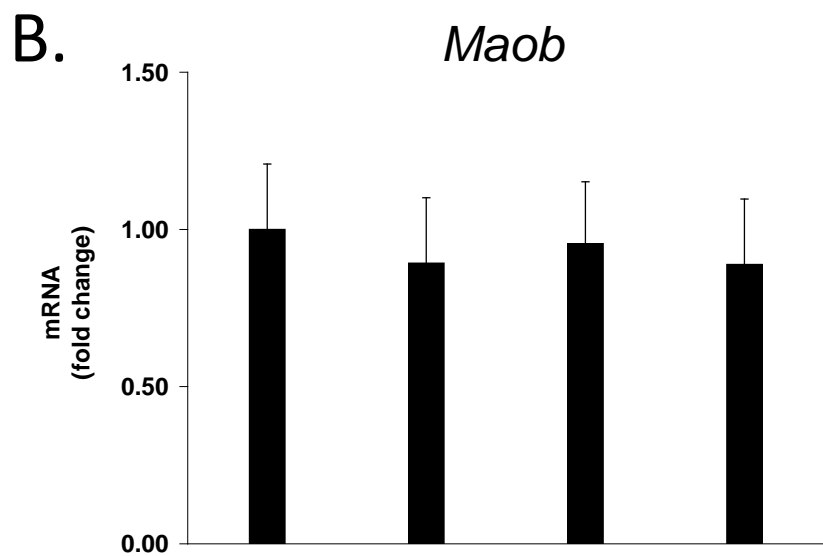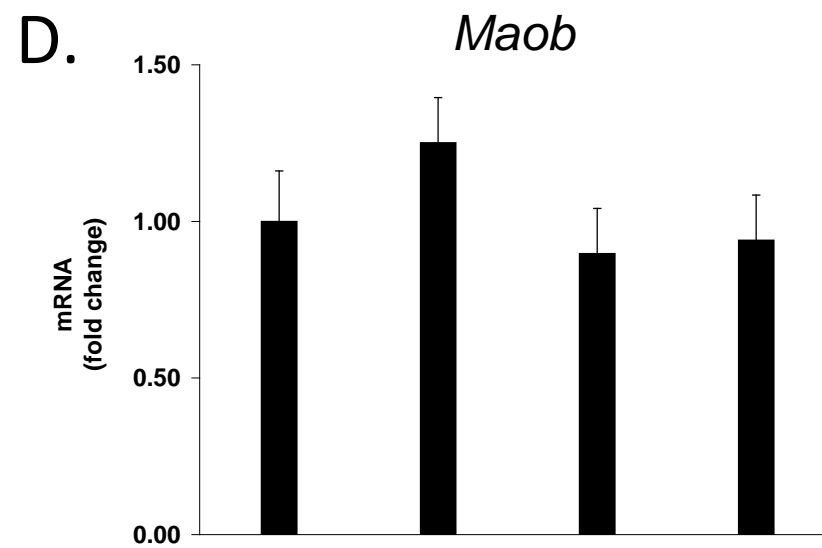

|               |   |   |   |   |
|---------------|---|---|---|---|
| Restraint:    | - | - | + | + |
| Phentolamine: | - | + | - | + |

|               |   |   |   |   |
|---------------|---|---|---|---|
| Restraint:    | - | - | + | + |
| Phentolamine: | - | + | - | + |

Supplement: NIHMS639769-supplement-2.pdf [file NIHMS639769-supplement-2.pdf]
